# Supplementary material
Source: Springer Nature journal article supplement (https://www.springermedizin.de/resource/supplementary/12876_2009_446_MOESM5_ESM.pdf/9437032)

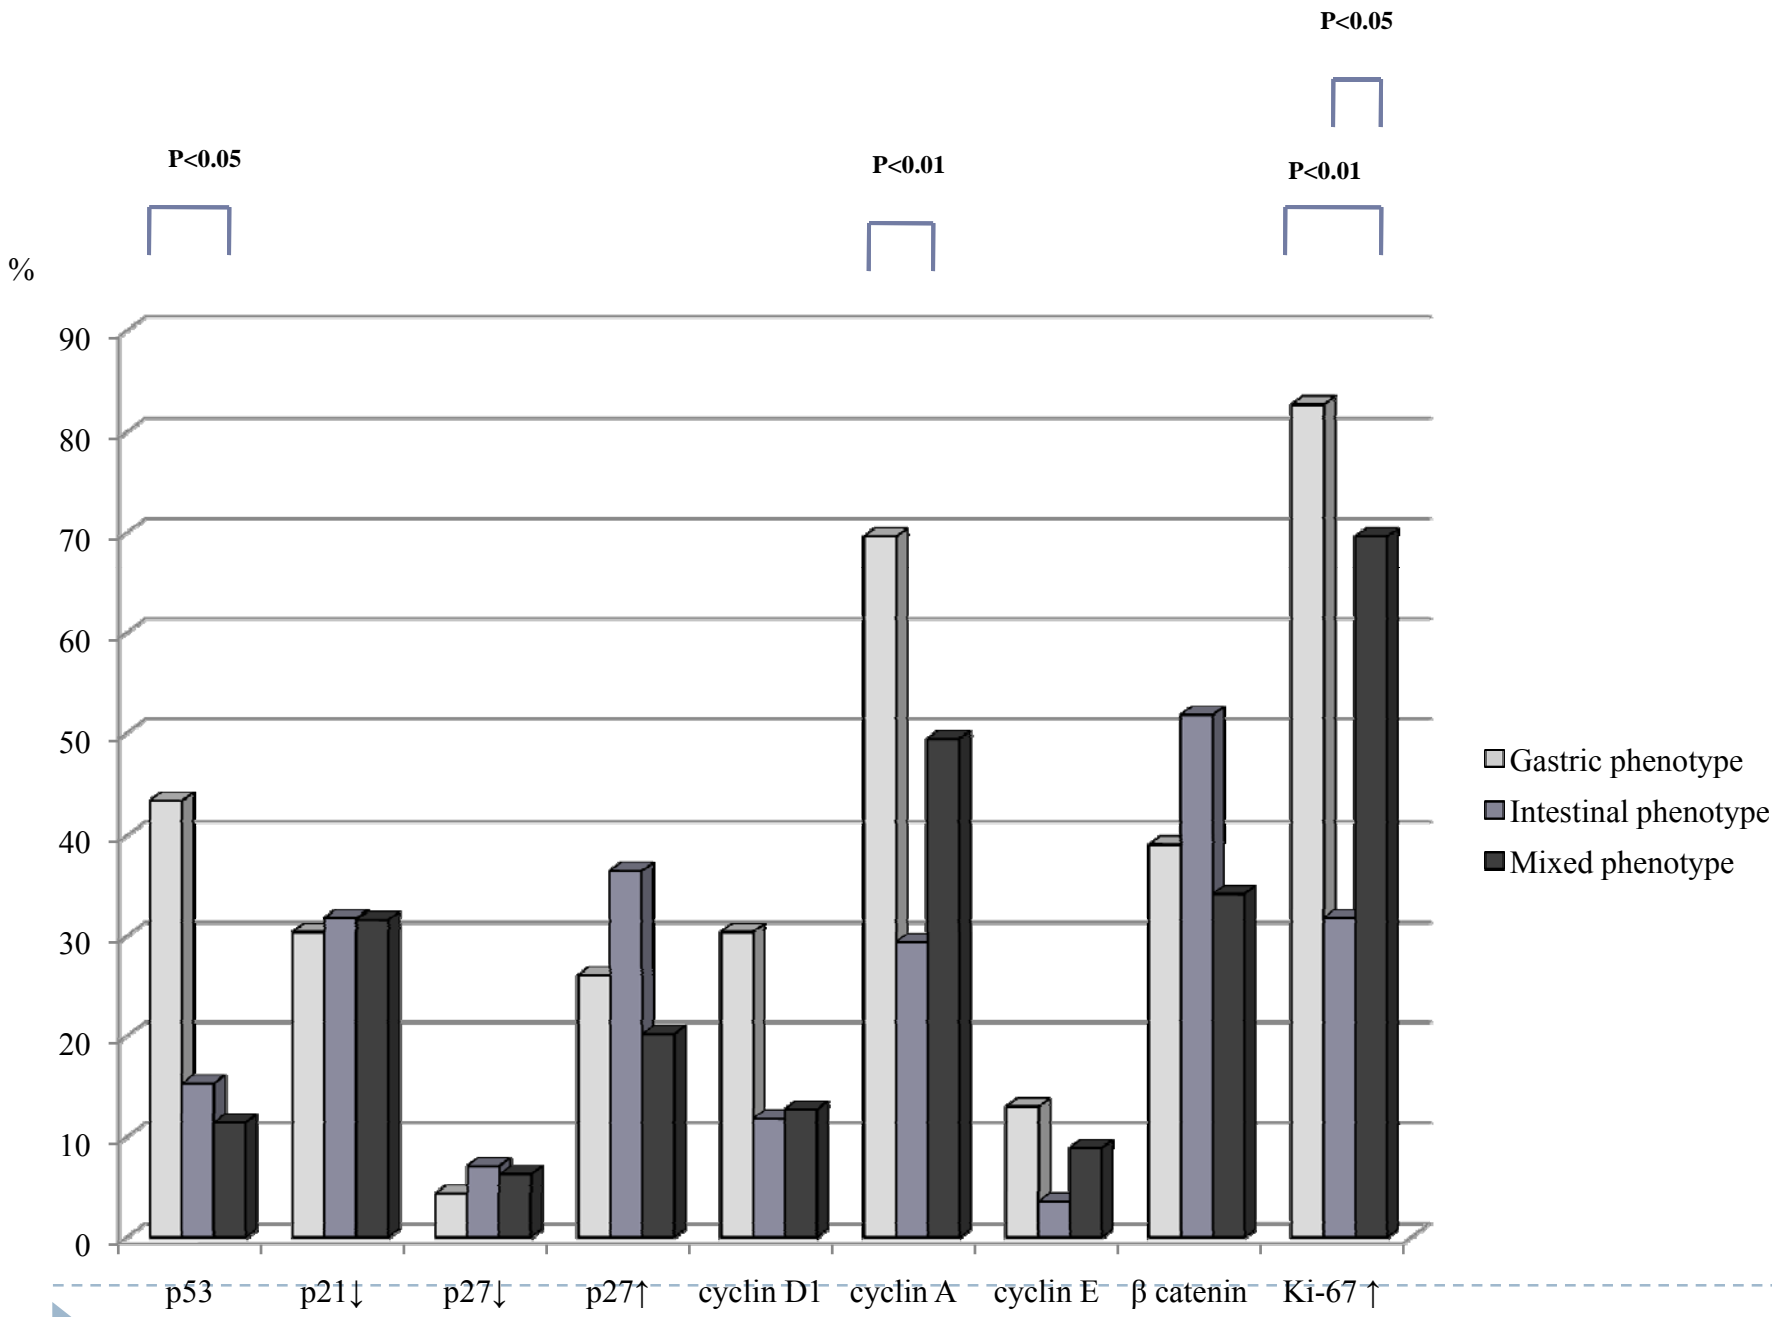

Supplement: MOESM5 [file 9437032]
